# Supplementary material for: p-Aminophenol sensor based on tetra-β-[3-(dimethylamine)phenoxy] phthalocyanine cobalt(ii)/multiwalled carbon nanotube hybrid
Source: Royal Society of Chemistry journal article supplement (doi:10.1039/c5ra00755k), 2015-01-01
Supplement: c5ra00755k1.pdf [file c5ra00755k1.pdf]

Electronic Supplementary Information

***p*-Aminophenol sensor based on tetra- $\beta$ -[3-(dimethylamine)phenoxy] phthalocyanine cobalt(II)/multiwalled carbon nanotube hybrid**

*Liangxiao Guo,<sup>a</sup> Zhimin Chen,<sup>\*a</sup> Jialin Zhang,<sup>a</sup> Hao Wu,<sup>a</sup> Feng Wu,<sup>a</sup> Chunying He,<sup>a</sup>  
Bin Wang<sup>a</sup> and Yiqun Wu<sup>a, b</sup>*

<sup>a</sup> Key Laboratory of Functional Inorganic Material Chemistry (Ministry of Education of China), School of Chemistry and Materials Science, Heilongjiang University, 74# Xuefu Road, Nangang District, Harbin 150080, People's Republic of China;

<sup>b</sup> Shanghai Institutes of Optics and Fine Mechanics, Chinese Academy of Sciences, 390# Qinghe Road, Jiading District, Shanghai 201800, People's Republic of China.

Corresponding author E-mail: zmchen@siom.ac.cn

Tel.: +86 451 8660 9145,

Fax: +86 451 8660 9145

## Experiment details

### 1.1. Materials

All chemicals and solvents in this work were of analytical grade and were used as-received. 5-Methyl-1-hexanol and 4-nitrophthalonitrile were purchased from Sigma-Aldrich Co. LLC. and Acros Chemical Co., respectively, and used without further purification. The synthetic scheme of tetra- $\beta$ -[3-(dimethylamino)phenoxy] phthalocyanine cobalt(II) (aPcCo) is shown in scheme S1.

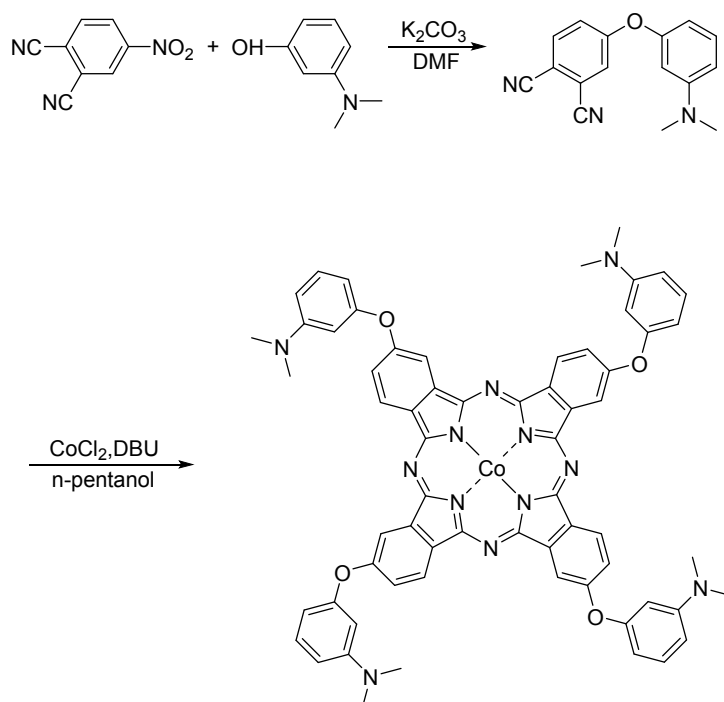

Scheme S1. Synthetical scheme of tetra- $\beta$ -[3-(dimethylamino)phenoxy] phthalocyanine cobalt(II)

### 1.2. Instrument and methods

Elemental analyses of C, H and N were carried out on a Vario EL elemental analyzer.  $^1H$  NMR spectra ( $CDCl_3$  solutions) were recorded at 500 MHz on a Bruker Advance AV-500 instrument. EI and MALDI-TOF mass spectra were performed using an Agilent spectrometer (HP 5973N) and a Bruker microflex LT (Bruker Daltonics, Bremen, Germany) mass spectrometer, respectively. UV/Vis absorption

spectra were recorded with a Lambda 35 UV/VIS spectrometer (Perkin-Elmer, USA). FT-IR spectra were recorded on a Nicolet FT-IR NEXUS spectrometer (Thermo Scientific).

### ***1.3. Synthesis of 4-[3-(dimethylamino)phenoxy] phthalonitrile***

4-Nitrophthalonitrile (6.92 g, 0.04 mol) was dissolved in 150 mL of dry DMF at room temperature, and 3-dimethylaminophenol (6.6 g, 0.048 mol) was added. After stirring for 15 min, 13.07 g of finely ground anhydrous  $K_2CO_3$  (0.094 mol) was added and stirred under nitrogen at room temperature for 96 h. Then, the mixture was poured into 200 mL of ice-water, filtered and the filter residue to dryness. After the crude product was purified by silica gel chromatography with an eluent  $CH_2Cl_2$ , and 4-[3-(dimethylamino)phenoxy]phthalonitrile was obtained. Yield: 8.53g (81%).  $^1H$  NMR ( $CDCl_3$ , TMS,  $\delta$  ppm): 2.97 (s, 6H,  $CH_3$ ), 6.34 (t, 1H), 6.61 (d, 1H), 6.63 (t, 1H), 7.23 (t, 1H), 7.26 (t, 1H), 7.29 (t, 1H), 7.70(s, 1H).

### ***1.4. Synthesis of tetra- $\beta$ -[3-(dimethylamine)phenoxy] phthalocyanine cobalt(II)***

A mixture of compound 4-[3-(dimethylamino)phenoxy] phthalonitrile (1.84 g, 6.98 mmol), anhydrous  $CoCl_2$  (0.46 g, 3.57 mmol), catalytic amount of (1 mL) DBU (1,8-diazabicyclo[5.4.0]undec-7-ene) (1 mL) of 25 mL n-pentanol was held at reflux temperature for 12 h in around-bottom flask under nitrogen. After cooling to room temperature the solvent was eliminated by vacuum distillation. The crude product was purified by silica gel column chromatography using carbon tetrachloride/acetone as (10:1) eluent to give blue crystals of tetra- $\beta$ -[3-(dimethylamine)phenoxy] phthalocyanine cobalt(II). Yield: 0.72 g (37%). Electronic absorption spectrum (UV-Vis) in DMF:  $\lambda_{max}$  (nm) =666nm. IR,  $\nu_{max}$  ( $cm^{-1}$ ): 1266  $cm^{-1}$ , 1471  $cm^{-1}$ , 1500  $cm^{-1}$ , 1572  $cm^{-1}$ , 1605  $cm^{-1}$ , 1724  $cm^{-1}$ , 2871  $cm^{-1}$ , 2927  $cm^{-1}$ . MALDI-MS Calcd (Found):  $m/z=1111.36$  (1111.21) [ $M^+$ ].

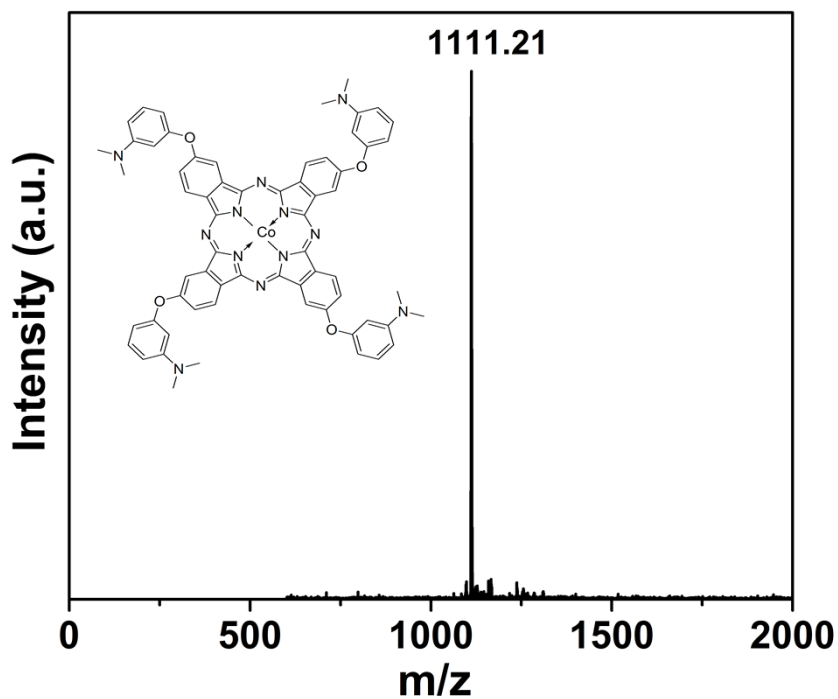

Fig. S1 MALDI mass spectra of tetra- $\beta$ -[3-(dimethylamino)phenoxy] phthalocyanine cobalt(II)

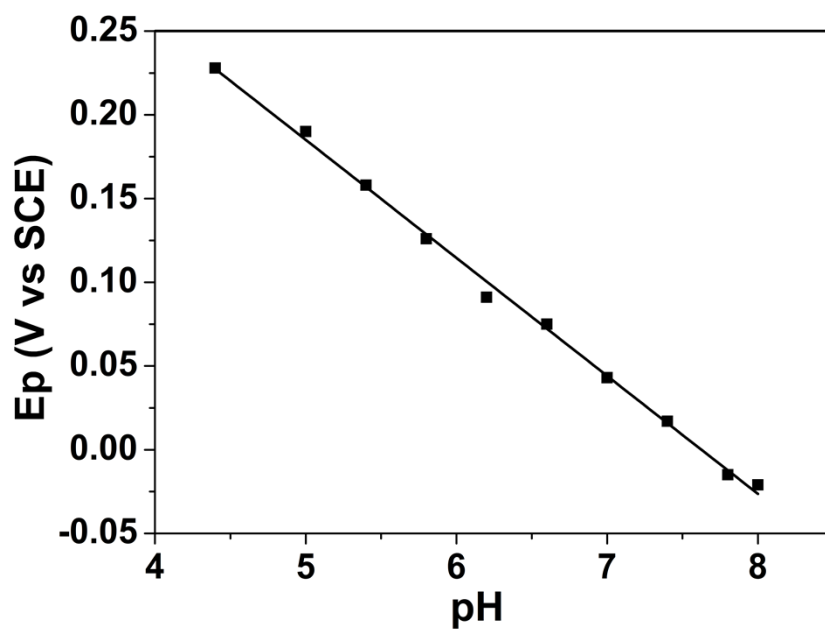

Fig. S2 The relation between the reduction peak potentials and the pH value.

**Table S1** Comparison of the analytical performance of different 4-AP sensors

| Electrode                                | Linear range<br>( $\mu\text{M}$ ) | Limit detection<br>( $\mu\text{M}$ ) | Technique                | Ref.      |
|------------------------------------------|-----------------------------------|--------------------------------------|--------------------------|-----------|
| SWNTs/POAPE/GCE <sup>a</sup>             | 0.2-100                           | 0.06                                 | DPV                      | 1         |
| GR-PANI/GCE <sup>b</sup>                 | 0.2-20 20-100                     | 0.065                                | DPV                      | 2         |
| PEDOT/GCE <sup>c</sup>                   | 4.0-320                           | 1.2                                  | DPV                      | 3         |
| NH <sub>2</sub> -SBA-15/CPE <sup>d</sup> | 0.1-12                            | 0.02                                 | DPV                      | 4         |
| Graphene-Nafion/GCE <sup>e</sup>         | 0.5-200                           | 0.051                                | DPV                      | 5         |
| Hemin-MIP/GCE <sup>f</sup>               | 10-90                             | 3                                    | Amperometric<br>response | 6         |
| Graphene-chitosan/GCE <sup>g</sup>       | 0.2-550                           | 0.057                                | DPV                      | 7         |
| AuNPs/SDS-LDH/GCE <sup>h</sup>           | 0.5-200                           | NR <sup>1</sup>                      | DPV                      | 8         |
| aPcCo/CNT/GCE                            | 0.5-300 300-800                   | 0.3                                  | DPV                      | this work |

Remark: a) Single-wall carbon nanotubes/poly(4-aminopyridine) modified GCE; b) Graphene–polyaniline modified GCE; c) Poly(3,4-ethylenedioxythiophene) modified GCE; d) Aminophenol isomers based on functionalized SBA-15 mesoporous silica modified carbon paste electrode; e) Nafion–graphene composite film modified GCE; f) The hemin-based molecularly imprinted polymer grafted onto a glassy carbon electrode; g) Graphene-chitosan composite film modified GCE; h) Gold nanoparticles and an organophilic layered double hydroxide modified GCE. 1) Not reported

**Table S2** Electroanalytical application of aPcCo/CNT/GC electrode for 4-AP determination in real samples

| Sample | Added<br>( $\mu\text{M}$ ) | Found<br>( $\mu\text{M}$ ) | Recovery<br>(%) | RSD<br>(%) (n=3) |
|--------|----------------------------|----------------------------|-----------------|------------------|
| 1      | 5                          | 4.7                        | 94              | 3.22             |
| 2      | 10                         | 9.5                        | 95              | 2.47             |
| 3      | 15                         | 16.2                       | 108             | 2.73             |
| 4      | 20                         | 21.5                       | 107.5           | 2.61             |

## References

- [1] Z. H. Wang, H. F. Zhu, H. Zhang, G. Q. Gao, Z. D. Sun, H. P. Liu and X. L. Zhao, *Electrochim. Acta*, 2009, **54**, 7531-7535.
- [2] Y. Fan, J. H. Liu, C. P. Yang, M. Yua and P. Liu, *Sens. Actuators, B*, 2011, **157**, 669-674.
- [3] S. Mehretie, S. Admassie, T. Hunde, M. Tessema and T. Solomon, *Talanta*, 2011, **85**, 1376-1382.
- [4] S. Duan, X. Zhang, S. Xu and C. L. Zhou, *Electrochim. Acta*, 2013, **88**, 885-891.
- [5] H. Filik, G. Cetintas, S. N. Koc, H. Gulce and I. Boz, *Russ. J. Electrochem.*, 2014, **50(3)**, 243-252.
- [6] J. D. M. Neto, W. D. R. Santos, P. R. Lima, S. M. C. N. Tanaka, A. A. Tanaka, L. T. Kubota, *Sens. Actuators, B*, 2011, **152**, 220-225.
- [7] H. S. Yin, Q. Ma, Y. L. Zhou, S. Y. Ai and L. S. Zhu, *Electrochim. Acta*, 2010, **55**, 7102-7108.
- [8] H. S. Yin, K. Shang, X. M. Meng and S. Y. Ai, *Microchim. Acta*, 2011, **175**, 39-46.
